# Supplementary material
Source: PubMed Central journal article supplement (PMC8441301)

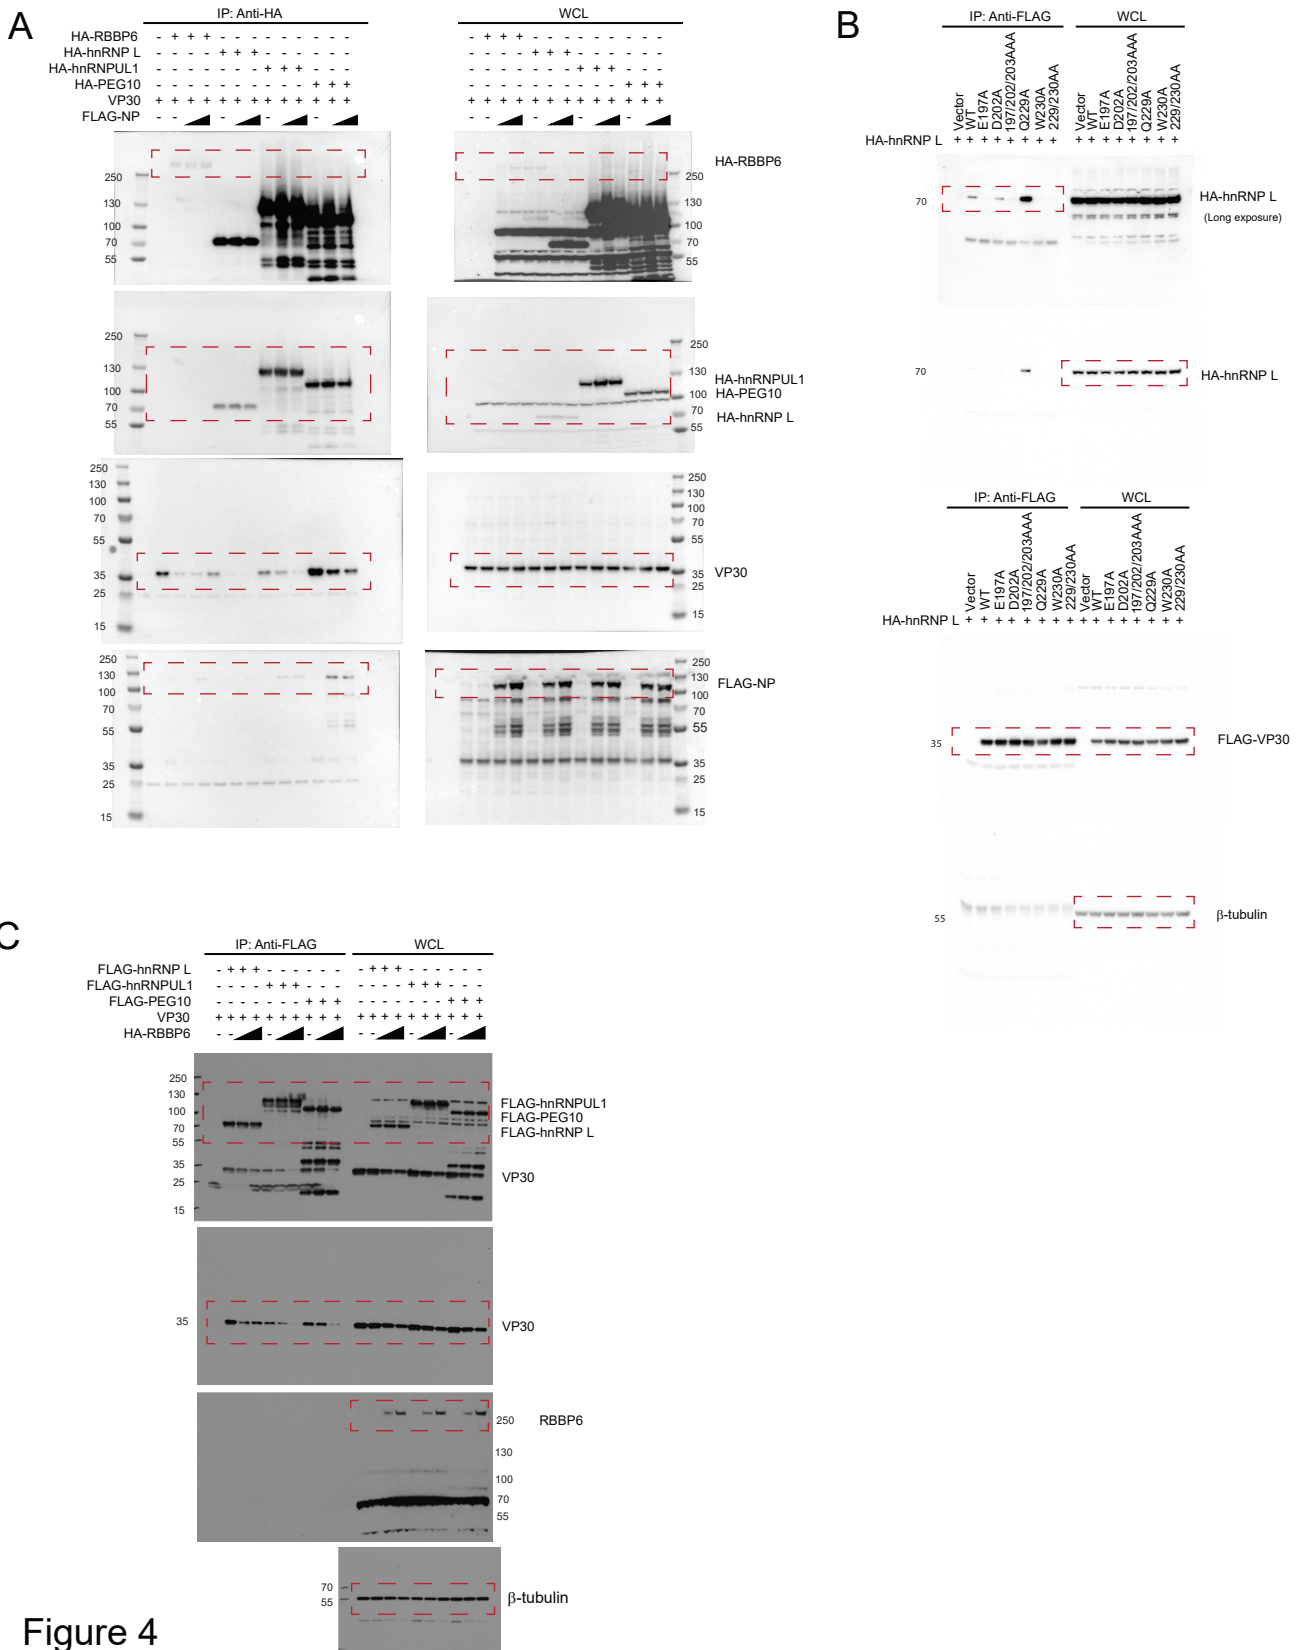

Figure 4

Supplement: EMBJ-40-e105658-s004.pdf [file EMBJ-40-e105658-s004.pdf]

**B**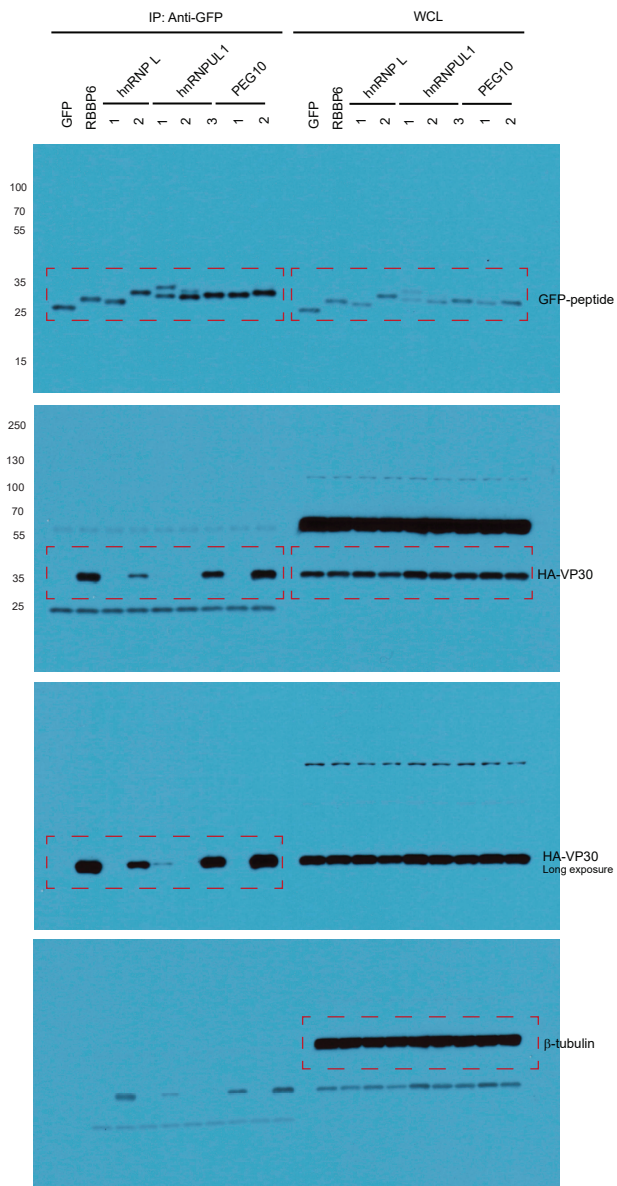**Figure 2**

Supplement: EMBJ-40-e105658-s005.pdf [file EMBJ-40-e105658-s005.pdf]

C

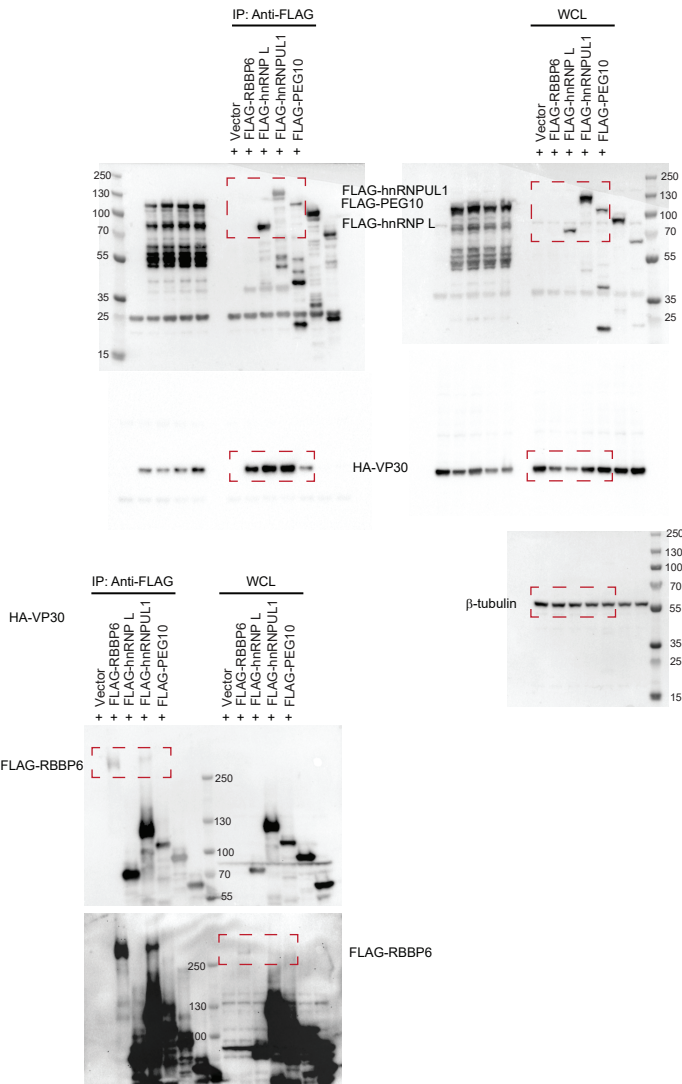

D

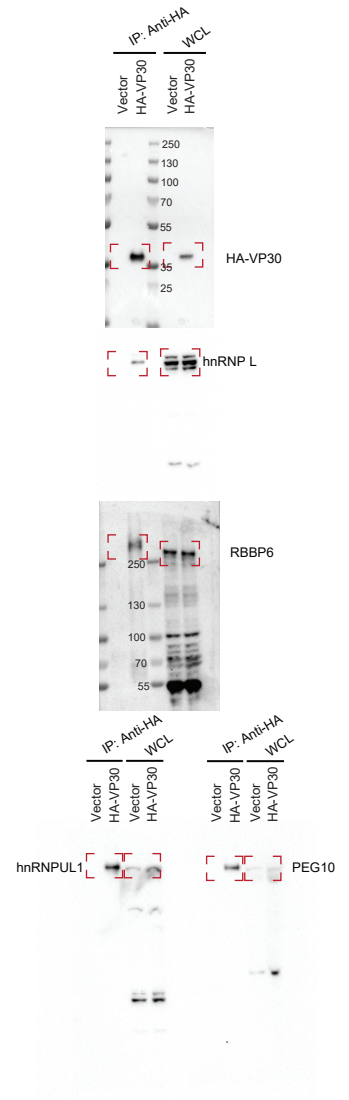

Figure 1

Supplement: EMBJ-40-e105658-s006.pdf [file EMBJ-40-e105658-s006.pdf]
